# Supplementary material for: Abundant genetic variation is retained in many laboratory schistosome populations
Source: PubMed Central journal article supplement — bioRxiv. 2024 Oct 24:2024.10.21.619418. Preprint. [Version 1] doi: 10.1101/2024.10.21.619418 (PMC11526883; doi:10.1101/2024.10.21.619418), 2024-10-24

**A**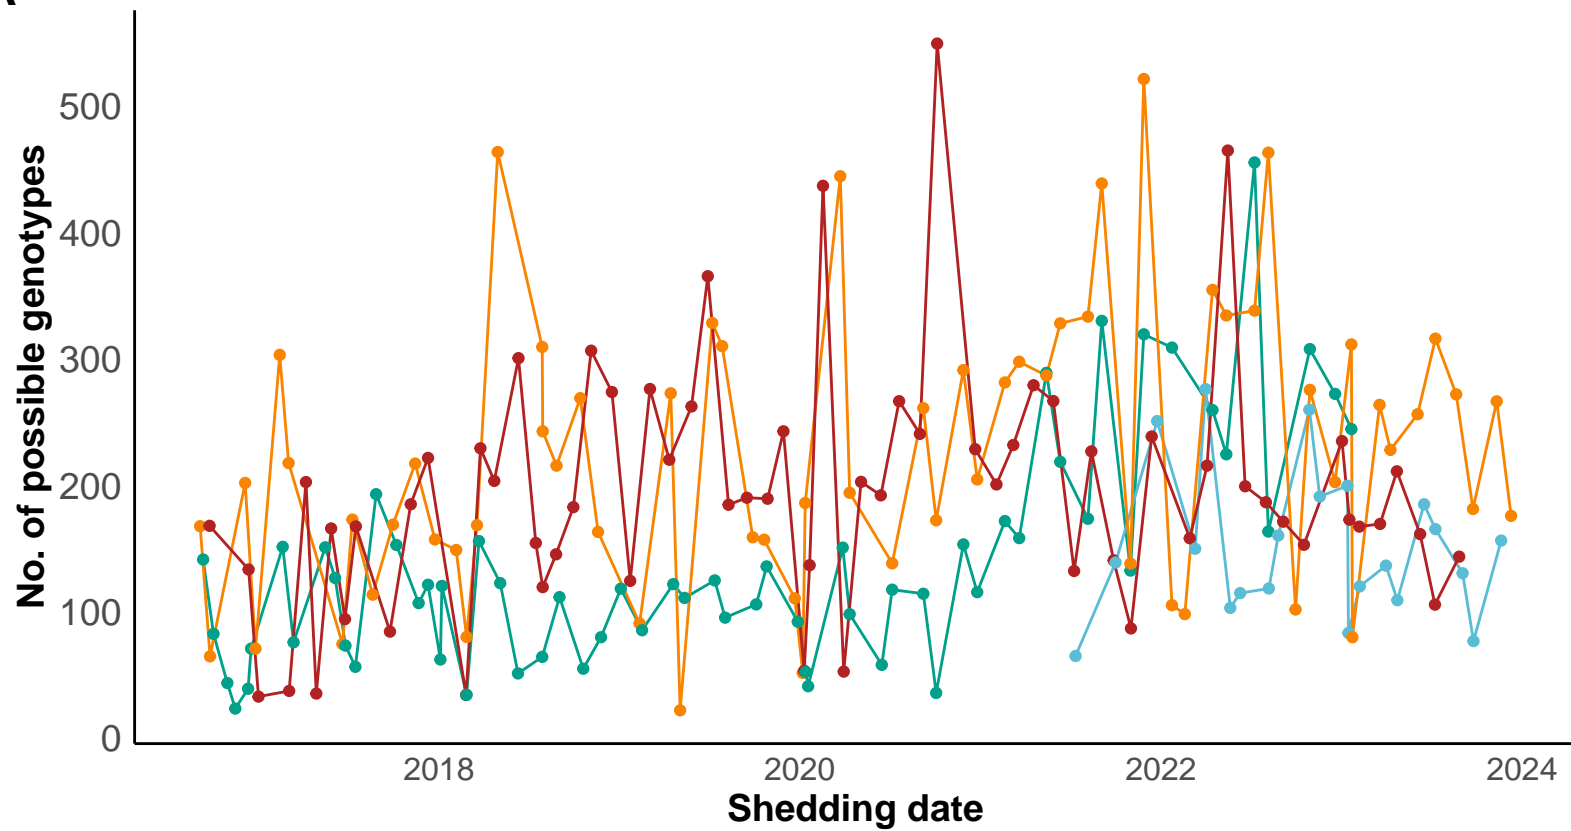

Population — BRE — EG — LE — OR

**B**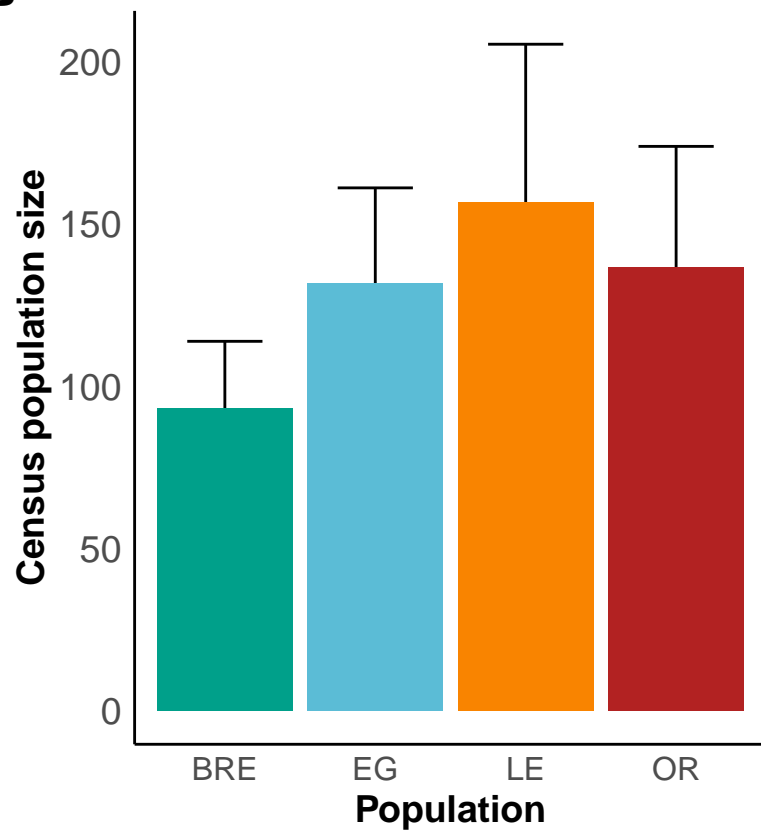**C**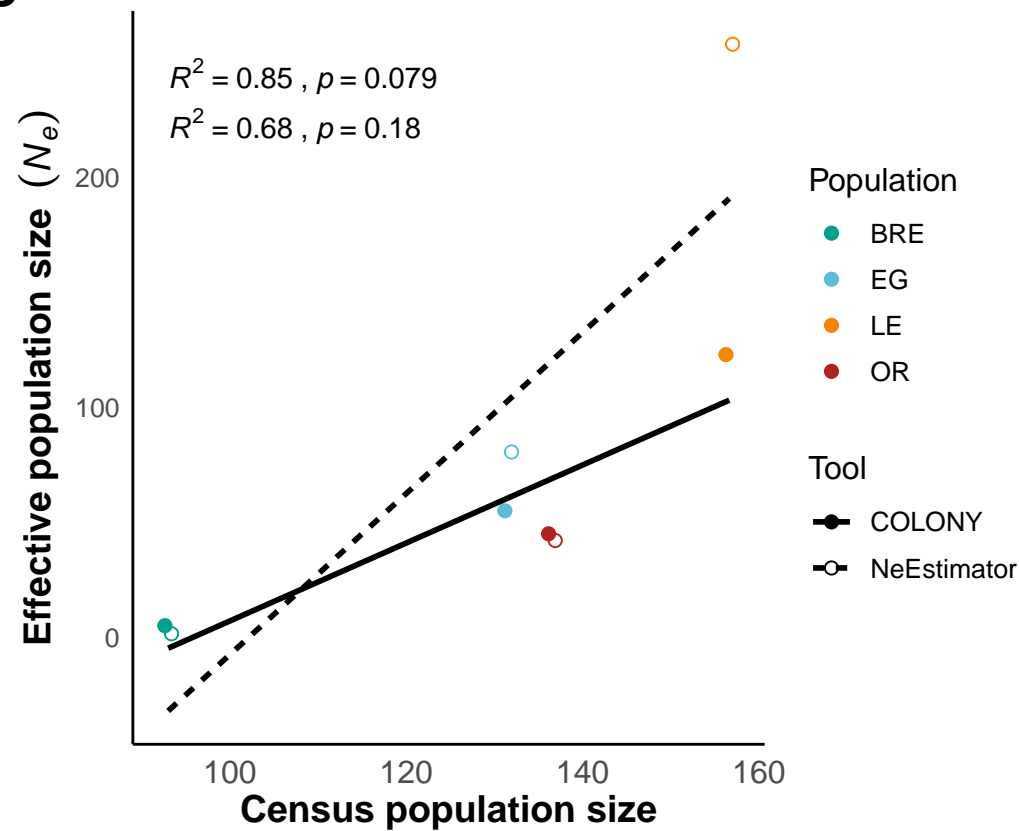

Supplement: media-3.pdf [file media-3.pdf]
